# Supplementary material for: Quality of Life in POP: Validity, Reliability and Responsiveness of the Prolapse Quality of Life Questionnaire (P-QoL) in Spanish Women
Source: MDPI journal article supplement (doi:10.3390/ijerph17051690), 2020-03-05
Supplement: s1 [file s1]

## CUESTIONARIO DE CALIDAD DE VIDA EN EL PROLAPSO

Nombre y Apellidos: .....

Edad (años): .....

Fecha de hoy: ...../...../.....

**EL PROLAPSO ES UN BULTO QUE DESCIENDE POR LA VAGINA  
ORIGINANDO MOLESTIA**

**POR FAVOR, CUMPLIMENTE ESTE CUESTIONARIO, AUNQUE CREA QUE  
NO TIENE UN PROLAPSO**

**1.-¿Cómo describiría su salud actualmente?, por favor marque una única  
respuesta.**

- |           |                       |
|-----------|-----------------------|
| Muy buena | <input type="radio"/> |
| Buena     | <input type="radio"/> |
| Regular   | <input type="radio"/> |
| Mala      | <input type="radio"/> |
| Muy mala  | <input type="radio"/> |

**2.-¿Cuánto cree que le afecta el prolapso a su vida?, por favor marque una única  
respuesta.**

- |               |                       |
|---------------|-----------------------|
| Nada          | <input type="radio"/> |
| Un poco       | <input type="radio"/> |
| Moderadamente | <input type="radio"/> |
| Mucho         | <input type="radio"/> |

**3.1.- Por favor, señale si tiene alguno de los siguientes síntomas, y si el síntoma está presente, marque cuánto le afecta.**

|                                                                                      |                       | El síntoma <u>SÍ</u> está presente, le afecta....<br>↓ |                       |                       |                       |
|--------------------------------------------------------------------------------------|-----------------------|--------------------------------------------------------|-----------------------|-----------------------|-----------------------|
|                                                                                      | <b>NO<br/>tengo</b>   | Nada                                                   | Poco                  | Modera-<br>damente    | Mucho                 |
| Ir al baño a orinar con mucha frecuencia                                             | <input type="radio"/> | <input type="radio"/>                                  | <input type="radio"/> | <input type="radio"/> | <input type="radio"/> |
| Urgencia: un deseo urgente de ir a orinar                                            | <input type="radio"/> | <input type="radio"/>                                  | <input type="radio"/> | <input type="radio"/> | <input type="radio"/> |
| Incontinencia de urgencia: pérdidas de orina asociadas con un fuerte deseo de orinar | <input type="radio"/> | <input type="radio"/>                                  | <input type="radio"/> | <input type="radio"/> | <input type="radio"/> |
| Incontinencia de esfuerzo: pérdidas de orina por ejemplo al toser                    | <input type="radio"/> | <input type="radio"/>                                  | <input type="radio"/> | <input type="radio"/> | <input type="radio"/> |
| Sensación de una protuberancia/ bulto en su vagina o saliendo de ella                | <input type="radio"/> | <input type="radio"/>                                  | <input type="radio"/> | <input type="radio"/> | <input type="radio"/> |
| Sensación de pesadez en la vagina o en la parte baja del abdomen durante el día      | <input type="radio"/> | <input type="radio"/>                                  | <input type="radio"/> | <input type="radio"/> | <input type="radio"/> |
| El bulto en la vagina interfiere cuando defeca                                       | <input type="radio"/> | <input type="radio"/>                                  | <input type="radio"/> | <input type="radio"/> | <input type="radio"/> |
| Molestia en la vagina que empeora cuando está de pie y mejora cuando se tumba        | <input type="radio"/> | <input type="radio"/>                                  | <input type="radio"/> | <input type="radio"/> | <input type="radio"/> |
| Chorro de orina escaso                                                               | <input type="radio"/> | <input type="radio"/>                                  | <input type="radio"/> | <input type="radio"/> | <input type="radio"/> |
| Necesidad de esforzarse para orinar                                                  | <input type="radio"/> | <input type="radio"/>                                  | <input type="radio"/> | <input type="radio"/> | <input type="radio"/> |
| Goteo de orina tras orinar                                                           | <input type="radio"/> | <input type="radio"/>                                  | <input type="radio"/> | <input type="radio"/> | <input type="radio"/> |

3.2.- Por favor, señale si tiene alguno de los siguientes síntomas, y si el síntoma está presente marque cuánto le afecta.

|                                                                                                                                                                                                                                                                                                                                                                                                                   |                       | Si, me afecta...<br>↓<br>Nada      Poco      Modera-<br>damente      Mucho |                       |                           |                       |                       |                       |                |                     |                     |                           |                       |                       |                       |                       |                       |
|-------------------------------------------------------------------------------------------------------------------------------------------------------------------------------------------------------------------------------------------------------------------------------------------------------------------------------------------------------------------------------------------------------------------|-----------------------|----------------------------------------------------------------------------|-----------------------|---------------------------|-----------------------|-----------------------|-----------------------|----------------|---------------------|---------------------|---------------------------|-----------------------|-----------------------|-----------------------|-----------------------|-----------------------|
|                                                                                                                                                                                                                                                                                                                                                                                                                   | NO tengo              |                                                                            |                       |                           |                       |                       |                       |                |                     |                     |                           |                       |                       |                       |                       |                       |
| Sensación de no vaciar totalmente el intestino tras defecar                                                                                                                                                                                                                                                                                                                                                       | <input type="radio"/> | <input type="radio"/>                                                      | <input type="radio"/> | <input type="radio"/>     | <input type="radio"/> | <input type="radio"/> |                       |                |                     |                     |                           |                       |                       |                       |                       |                       |
| Estreñimiento: dificultad defecar                                                                                                                                                                                                                                                                                                                                                                                 | <input type="radio"/> | <input type="radio"/>                                                      | <input type="radio"/> | <input type="radio"/>     | <input type="radio"/> | <input type="radio"/> |                       |                |                     |                     |                           |                       |                       |                       |                       |                       |
| Necesidad de esforzarse para defecar                                                                                                                                                                                                                                                                                                                                                                              | <input type="radio"/> | <input type="radio"/>                                                      | <input type="radio"/> | <input type="radio"/>     | <input type="radio"/> | <input type="radio"/> |                       |                |                     |                     |                           |                       |                       |                       |                       |                       |
| El bulto en la vagina afecta a sus relaciones sexuales                                                                                                                                                                                                                                                                                                                                                            | <input type="radio"/> | <input type="radio"/>                                                      | <input type="radio"/> | <input type="radio"/>     | <input type="radio"/> | <input type="radio"/> |                       |                |                     |                     |                           |                       |                       |                       |                       |                       |
| La molestia vaginal empeora el dolor de espalda                                                                                                                                                                                                                                                                                                                                                                   | <input type="radio"/> | <input type="radio"/>                                                      | <input type="radio"/> | <input type="radio"/>     | <input type="radio"/> | <input type="radio"/> |                       |                |                     |                     |                           |                       |                       |                       |                       |                       |
| Se ayuda usted con los dedos para defecar                                                                                                                                                                                                                                                                                                                                                                         | <input type="radio"/> | <input type="radio"/>                                                      | <input type="radio"/> | <input type="radio"/>     | <input type="radio"/> | <input type="radio"/> |                       |                |                     |                     |                           |                       |                       |                       |                       |                       |
| ¿Con qué frecuencia defeca? <table border="0" style="width: 100%;"> <tr> <td>Más de una vez al día</td> <td>Una vez al día</td> <td>Una vez cada 2 días</td> <td>Una vez cada 3 días</td> <td>Una vez a la semana o más</td> </tr> <tr> <td><input type="radio"/></td> <td><input type="radio"/></td> <td><input type="radio"/></td> <td><input type="radio"/></td> <td><input type="radio"/></td> </tr> </table> |                       |                                                                            |                       |                           |                       |                       | Más de una vez al día | Una vez al día | Una vez cada 2 días | Una vez cada 3 días | Una vez a la semana o más | <input type="radio"/> |
| Más de una vez al día                                                                                                                                                                                                                                                                                                                                                                                             | Una vez al día        | Una vez cada 2 días                                                        | Una vez cada 3 días   | Una vez a la semana o más |                       |                       |                       |                |                     |                     |                           |                       |                       |                       |                       |                       |
| <input type="radio"/>                                                                                                                                                                                                                                                                                                                                                                                             | <input type="radio"/> | <input type="radio"/>                                                      | <input type="radio"/> | <input type="radio"/>     |                       |                       |                       |                |                     |                     |                           |                       |                       |                       |                       |                       |

A continuación, se enumeran diversas actividades de la vida diaria que pueden verse afectadas por su problema de prolapso, por favor, indique cuanto le afecta.

Nos gustaría que contestase a todas las preguntas.

| 4.-LIMITACIONES DE LAS ACTIVIDADES DIARIAS                                                            | Nada                  | Poco                  | Moderadamente         | Mucho                 |
|-------------------------------------------------------------------------------------------------------|-----------------------|-----------------------|-----------------------|-----------------------|
| 4.A ¿Cuánto le limita el prolapso en las tareas del hogar (p.e. limpiar, comprar, etc.)?              | <input type="radio"/> | <input type="radio"/> | <input type="radio"/> | <input type="radio"/> |
| 4.B ¿El prolapso afecta a su trabajo o a alguna de las actividades diarias que realiza fuera de casa? | <input type="radio"/> | <input type="radio"/> | <input type="radio"/> | <input type="radio"/> |

| 5.-LIMITACIONES FÍSICAS/SOCIALES                                                                 | Nada                  | Poco                  | Moderadamente         | Mucho                 |
|--------------------------------------------------------------------------------------------------|-----------------------|-----------------------|-----------------------|-----------------------|
| 5.A ¿El prolapso afecta a sus actividades físicas (p.e. andar, correr, gimnasia, deporte, etc.)? | <input type="radio"/> | <input type="radio"/> | <input type="radio"/> | <input type="radio"/> |
| 5.B ¿El prolapso afecta a su capacidad de viajar?                                                | <input type="radio"/> | <input type="radio"/> | <input type="radio"/> | <input type="radio"/> |
| 5.C ¿El prolapso limita su vida social?                                                          | <input type="radio"/> | <input type="radio"/> | <input type="radio"/> | <input type="radio"/> |
| 5.D ¿El prolapso limita su capacidad para ver/visitar amigos?                                    | <input type="radio"/> | <input type="radio"/> | <input type="radio"/> | <input type="radio"/> |

| No tiene                 | 6.-RELACIONES PERSONALES                         | Nada                  | Poco                  | Moderadamente         | Mucho                 |
|--------------------------|--------------------------------------------------|-----------------------|-----------------------|-----------------------|-----------------------|
| <input type="checkbox"/> | 6.A ¿El prolapso afecta a su relación de pareja? | <input type="radio"/> | <input type="radio"/> | <input type="radio"/> | <input type="radio"/> |
| <input type="checkbox"/> | 6.B ¿El prolapso afecta a su vida sexual?        | <input type="radio"/> | <input type="radio"/> | <input type="radio"/> | <input type="radio"/> |
| <input type="checkbox"/> | 6.C ¿El prolapso afecta a su vida familiar?      | <input type="radio"/> | <input type="radio"/> | <input type="radio"/> | <input type="radio"/> |

| 7.-EMOCIONES                                          | Nada                  | Poco                  | Moderadamente         | Mucho                 |
|-------------------------------------------------------|-----------------------|-----------------------|-----------------------|-----------------------|
| 7.A ¿El prolapso la deprime?                          | <input type="radio"/> | <input type="radio"/> | <input type="radio"/> | <input type="radio"/> |
| 7.B ¿El prolapso le hace sentirse ansiosa o nerviosa? | <input type="radio"/> | <input type="radio"/> | <input type="radio"/> | <input type="radio"/> |
| 7.C ¿El prolapso le hace sentirse mal consigo misma?  | <input type="radio"/> | <input type="radio"/> | <input type="radio"/> | <input type="radio"/> |

| 8.-SUEÑO/VITALIDAD                  | Nada                  | Poco                  | Modera-<br>damente    | Mucho                 |
|-------------------------------------|-----------------------|-----------------------|-----------------------|-----------------------|
| 8.A ¿El prolapso afecta a su sueño? | <input type="radio"/> | <input type="radio"/> | <input type="radio"/> | <input type="radio"/> |
| 8.B ¿Se siente agotada/cansada?     | <input type="radio"/> | <input type="radio"/> | <input type="radio"/> | <input type="radio"/> |

**9.1 ¿Con qué frecuencia utiliza los siguientes dispositivos o ayudas para mejorar sus síntomas de prolapso?**

|                                                                | Nunca                 | Pocas<br>veces        | Algunas<br>veces      | Muchas<br>veces       |
|----------------------------------------------------------------|-----------------------|-----------------------|-----------------------|-----------------------|
| 9.1.A ¿Usa tampones/compresas/salva slips/ fajas para mejorar? | <input type="radio"/> | <input type="radio"/> | <input type="radio"/> | <input type="radio"/> |
| 9.1.B ¿Se empuja el prolapso hacia arriba?                     | <input type="radio"/> | <input type="radio"/> | <input type="radio"/> | <input type="radio"/> |

**9.2 ¿Con qué frecuencia tiene los siguientes síntomas debidos al prolapso?**

|                                                   | Nunca                 | Poco                  | Modera-<br>damente    | Mucho                 |
|---------------------------------------------------|-----------------------|-----------------------|-----------------------|-----------------------|
| 9.2.A ¿Tiene dolor o malestar debido al prolapso? | <input type="radio"/> | <input type="radio"/> | <input type="radio"/> | <input type="radio"/> |
| 9.2.B ¿El prolapso le impide estar de pie?        | <input type="radio"/> | <input type="radio"/> | <input type="radio"/> | <input type="radio"/> |

**POR FAVOR, COMPRUEBE QUE HA RESPONDIDO A TODAS LAS PREGUNTAS**

**¡MUCHAS GRACIAS POR SU TIEMPO!**
