# Supplementary material for: Quality of Life in POP: Validity, Reliability and Responsiveness of the Prolapse Quality of Life Questionnaire (P-QoL) in Spanish Women
Source: MDPI journal article supplement (doi:10.3390/ijerph17051690), 2020-03-05
Supplement: s1 [file s1]

## PUNTUACIÓN DEL P-QoL

Las preguntas sobre síntomas urinarios, intestinales y sexuales no puntúan (P3.1 y P3.2). Estas preguntas valoran síntomas que pueden estar o no relacionados con el prolapso.

La puntuación mínima de cada dominio es 0, y la máxima es 100.

| DOMINIO                        | PREGUNTAS                   | RANGO DE PUNTUACIÓN | CÁLCULO PUNTUACIÓN                                                                                                                                                          |
|--------------------------------|-----------------------------|---------------------|-----------------------------------------------------------------------------------------------------------------------------------------------------------------------------|
| 1. PERCEPCIÓN DE SALUD GENERAL | P1                          | 1-5                 | $(P1-1) / 4 \times 100$                                                                                                                                                     |
| 2. IMPACTO DE PROLAPSO         | P2                          | 1-4                 | $(P2-1) / 3 \times 100$                                                                                                                                                     |
| 3. LIMITACIONES ROL            | P4.A-P4.B                   | 1-4                 | $((P4.A + P4B) - 2) / 6 \times 100$                                                                                                                                         |
| 4. LIMITACIONES FÍSICAS        | P5.A-P5.B                   | 1-4                 | $((P5.A + P5B) - 2) / 6 \times 100$                                                                                                                                         |
| 5. LIMITACIONES SOCIALES       | P5.C-P5.D                   | 1-4                 | $((P5.C + P5D + P6.C) - 3) / 9 \times 100$                                                                                                                                  |
|                                | P6.C                        | 0-4                 | Si P6.C = 0, entonces:<br>$((P5.C + P5D) - 2) / 6 \times 100$                                                                                                               |
| 6. RELACIONES PERSONALES       | P6.A-P6.B                   | 0-4                 | $((P6.A + P6.B) - 2) / 6 \times 100$<br>Si P6.A + P6.B = 1, entonces:<br>$((P6.A + P6.B) - 1) / 3 \times 100$<br>Si P6.A + P6.B = 0, entonces: valor perdido (no aplicable) |
| 7. EMOCIONES                   | P7.A-P7.B-P7.C              | 1-4                 | $((P7.A + P7B + P7.C) - 3) / 9 \times 100$                                                                                                                                  |
| 8. SUEÑO/ENERGÍA               | P8.A-P8.B                   | 1-4                 | $((P8.A + P8B) - 2) / 6 \times 100$                                                                                                                                         |
| 9. MEDIDAS DE SEVERIDAD        | P9.1.A-P9.1.B-P9.2.A-P9.2.B | 1-4                 | $((P9.1.A + P9.1.B + P9.2.A + P9.2.B) - 4) / 12 \times 100$                                                                                                                 |

### PREGUNTAS

1.-¿Cómo describiría su salud actualmente?, por favor marque una única respuesta.

2.-¿Cuánto cree que le afecta el prolapso a su vida?, por favor marque una única respuesta.

### PUNTUACIÓN = RESPUESTA

1 = Muy buena  
2 = Buena  
3 = Regular  
4 = Mala  
5 = Muy mala

1 = Nada  
2 = Un poco  
3 = Moderadamente  
4 = Mucho

- |                                                                                                        |                   |
|--------------------------------------------------------------------------------------------------------|-------------------|
| 4.A. ¿Cuánto le limita el prolapso en las tareas del hogar (p.e. limpiar, comprar, etc.)?              | 1 = Nada          |
| 4.B. ¿El prolapso afecta a su trabajo o a alguna de las actividades diarias que realiza fuera de casa? | 2 = Un poco       |
|                                                                                                        | 3 = Moderadamente |
|                                                                                                        | 4 = Mucho         |
| 5.A. ¿El prolapso afecta a sus actividades físicas (p.e. andar, correr, gimnasia, deporte, etc.)?      | 1 = Nada          |
| 5.B. ¿El prolapso afecta a su capacidad de viajar?                                                     | 2 = Un poco       |
| 5.C. ¿El prolapso limita su vida social?                                                               | 3 = Moderadamente |
| 5.D. ¿El prolapso limita su capacidad para ver/visitar amigos?                                         | 4 = Mucho         |
| 6.A. ¿El prolapso afecta a su relación de pareja?                                                      | 0 = No tiene      |
| 6.B. ¿El prolapso afecta a su vida sexual?                                                             | 1 = Nada          |
| 6.C. ¿El prolapso afecta a su vida familiar?                                                           | 2 = Un poco       |
|                                                                                                        | 3 = Moderadamente |
|                                                                                                        | 4 = Mucho         |
| 7.A. ¿El prolapso la deprime?                                                                          | 1 = Nada          |
| 7.B. ¿El prolapso le hace sentirse ansiosa o nerviosa?                                                 | 2 = Un poco       |
| 7.C. ¿El prolapso le hace sentirse mal consigo misma?                                                  | 3 = Moderadamente |
|                                                                                                        | 4 = Mucho         |
| 8.A. ¿El prolapso afecta a su sueño?                                                                   | 1 = Nada          |
| 8.B. ¿Se siente agotada/cansada?                                                                       | 2 = Un poco       |
|                                                                                                        | 3 = Moderadamente |
|                                                                                                        | 4 = Mucho         |
| 9.1.A. ¿Usa tampones/compresas/salva slips/ fajas para mejorar?                                        | 1 = Nada          |
| 9.1.B. ¿Se empuja el prolapso hacia arriba?                                                            | 2 = Un poco       |
|                                                                                                        | 3 = Moderadamente |
|                                                                                                        | 4 = Mucho         |
| 9.2.A. ¿Tiene dolor o malestar debido al prolapso?                                                     | 1 = Nada          |
| 9.2.B. ¿El prolapso le impide estar de pie?                                                            | 2 = Un poco       |
|                                                                                                        | 3 = Moderadamente |
|                                                                                                        | 4 = Mucho         |
